# Supplementary material for: A Comparative Study of Chemical Profiling and Bioactivities between Thai and Foreign Hemp Seed Species (Cannabis sativa L.) Plus an In-Silico Investigation
Source: MDPI journal article supplement (doi:10.3390/foods13010055), 2023-12-22
Supplement: s1 [file s1]

## Supplementary File

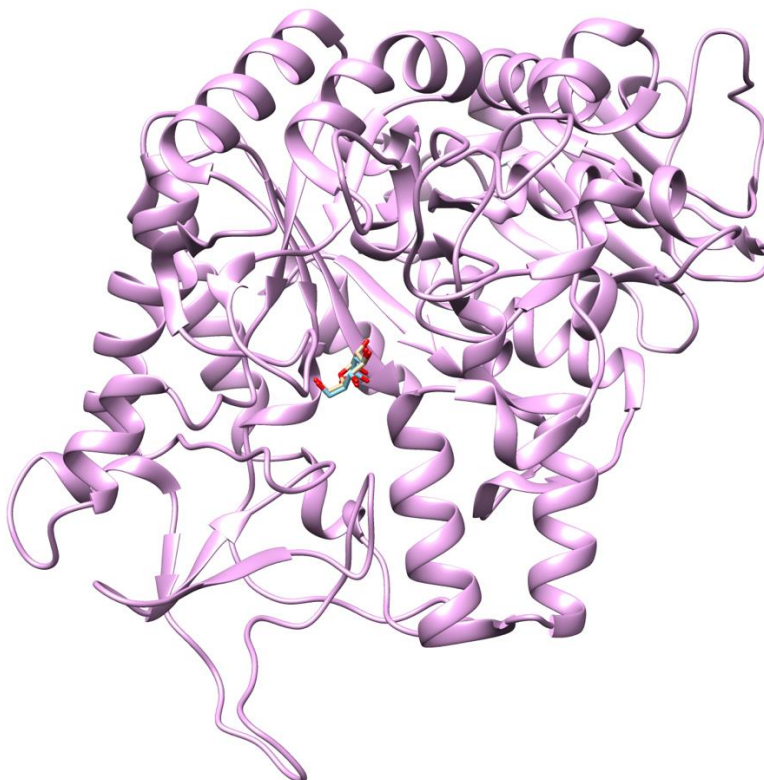

**Figure S1.** Docking validation of glucosidase enzyme (PDB ID 3A4A). The RMSD value of the re-docked (blue) and native (brown) glucose molecules is 2.715 Å (The accepted range is less than 3 Å).

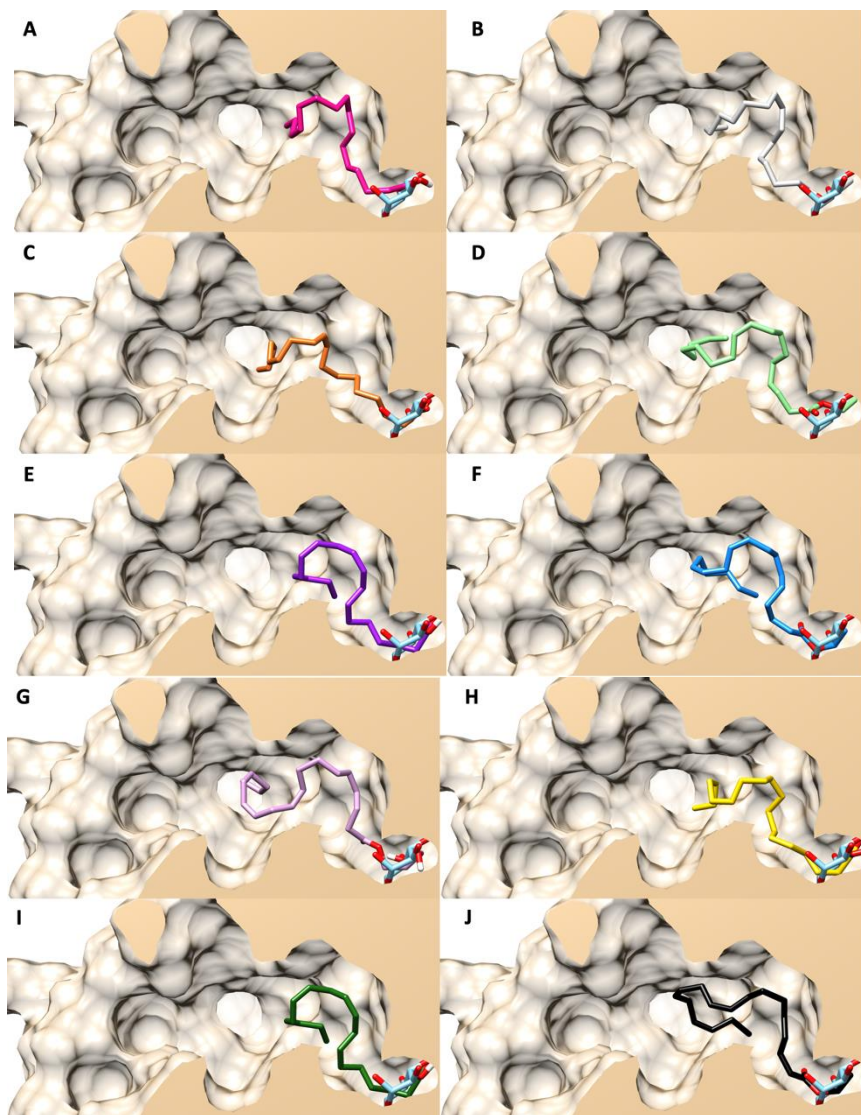

**Figure S2.** 3D docking poses of all fatty acids and their derivatives in close-up glucosidase catalytic pocket. A represents palmitic acid. B represents ethyl-palmitate. C represents oleic acid. D represents ethyl-oleate. E represents linoleic acid. F represents ethyl-linoleate. G represents glyceryl-linoleate. H represents steric acid. I represents linolenic acid. J represents ethyl-linolenate.

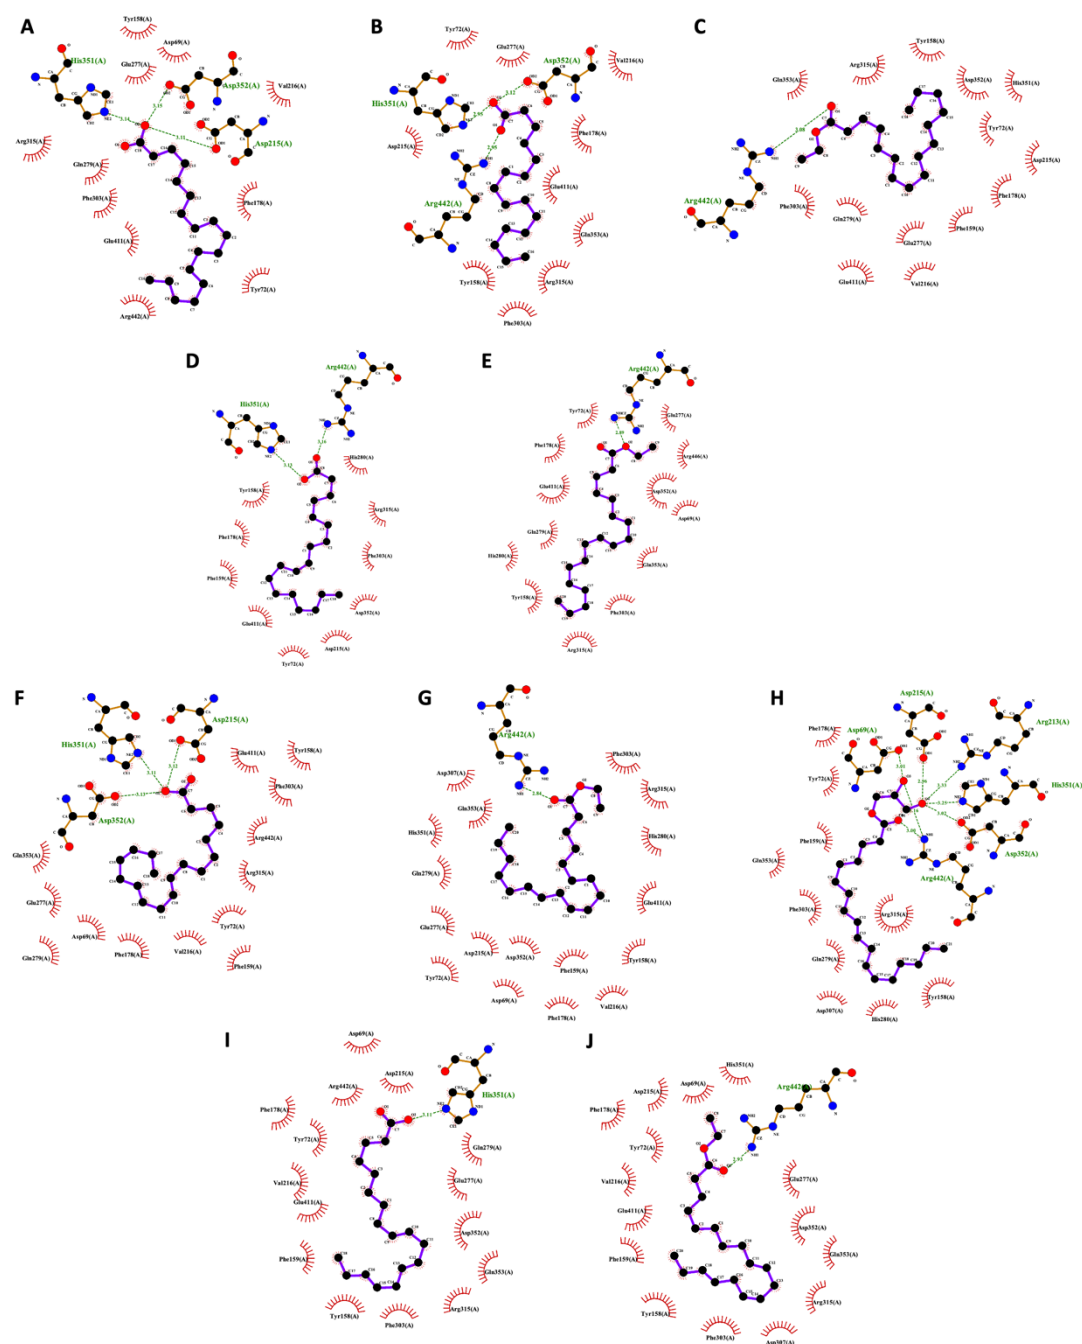

**Figure S3.** 2D interactions between docking poses of all fatty acids and amino acids in the glucosidase catalytic pocket. A represents steric acid. B represents Palmitic acid. C represents ethyl-palmitate. D and E represent oleic acid and ethyl-oleate. F and G represent linoleic acid and ethyl-linoleate. F, G, and H represent linoleic acid, ethyl-linoleate, and glyceryl-linoleate. I and J represent linolenic acid and ethyl-linolenate.

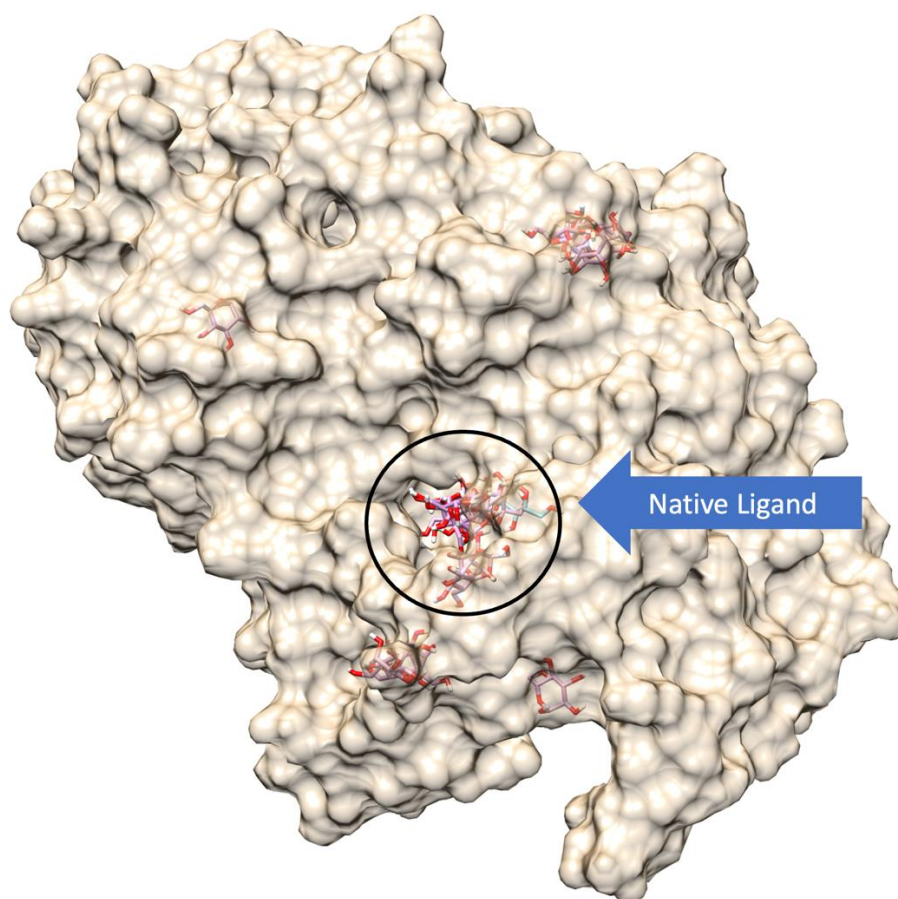

**Figure S4.** Additional docking validation for ligand-binding site prediction on glucosidase. Blue color ligand represents a native glucose molecule, while pink color ligands are docked glucose molecules. The black circle indicates a binding cluster with the highest docking poses, identical to the native ligand.

**Table S1.** Hemp seed samples and yield of different hemp parameter extractions.

| No. | Sample | Weight (g) | Extract part | Weight (g)<br>(Marc part) | Code        | Weight (g) | % yield<br>(w/w) |
|-----|--------|------------|--------------|---------------------------|-------------|------------|------------------|
| 1.  | RPF-1  | 2020.00    | Oil          | -                         | HS-TH-1-O   | 300.07     | 14.85            |
|     |        |            | Marc         | 651.39                    | HS-TH-1-M-H | 58.43      | 8.97             |
|     |        |            |              | 649.92                    | HS-TH-1-M-E | 35.88      | 5.52             |
| 2.  | RPF-3  | 2074.37    | Oil          | -                         | HS-TH-2-O   | 315.51     | 15.21            |
|     |        |            | Marc         | 848.52                    | HS-TH-2-M-H | 63.28      | 7.46             |
|     |        |            |              | 792.10                    | HS-TH-2-M-E | 63.28      | 7.99             |
| 3.  | FO#2   | 1958.16    | Oil          | -                         | HS-FS-1-O   | 298.77     | 15.26            |
|     |        |            | Marc         | 623.54                    | HS-FS-1-M-H | 16.59      | 2.66             |
|     |        |            |              | 546.06                    | HS-FS-1-M-E | 33.50      | 6.13             |
| 4.  | FO#3   | 900.00     | Oil          | -                         | HS-FS-2-O   | 172.48     | 19.16            |
|     |        |            | Marc         | 270.10                    | HS-FS-2-M-H | 16.68      | 6.17             |
|     |        |            |              | 271.90                    | HS-FS-2-M-E | 16.80      | 6.17             |

**Table S2.** Antibacterial activity of hemp seed oils and extracts against the tested bacteria at a concentration of 2 mg/ml.

|      | HS-<br>TH-<br>1-O | HS-<br>TH-<br>1-M-<br>E | HS-<br>TH-<br>1-M-<br>H | HS-<br>TH-<br>2-O | HS-<br>TH-<br>2-M-<br>E | HS-<br>TH-<br>2-M-<br>H | HS-<br>FS-1-<br>O | HS-<br>FS-1-<br>M-E | HS-<br>FS-1-<br>M-H | HS-<br>FS-2-<br>O | HS-<br>FS-2-<br>M-E | HS-<br>FS-2-<br>M-H |
|------|-------------------|-------------------------|-------------------------|-------------------|-------------------------|-------------------------|-------------------|---------------------|---------------------|-------------------|---------------------|---------------------|
| SA   | +                 | +                       | +                       | +                 | +                       | +                       | -                 | -                   | -                   | -                 | -                   | -                   |
| SE   | -                 | +                       | -                       | +                 | +                       | -                       | -                 | +                   | -                   | -                 | +                   | -                   |
| MRSA | -                 | +                       | -                       | +                 | +                       | +                       | -                 | -                   | -                   | -                 | -                   | -                   |
| CA   | -                 | +                       | -                       | +                 | +                       | +                       | -                 | +                   | -                   | -                 | +                   | -                   |
| EC   | -                 | -                       | -                       | -                 | -                       | -                       | -                 | -                   | -                   | -                 | -                   | -                   |
| PA   | -                 | -                       | -                       | -                 | -                       | -                       | -                 | -                   | -                   | -                 | -                   | -                   |

SA: *Staphylococcus aureus* (ATCC 25923), SE: *Staphylococcus epidermidis* (TISTR 517), MRSA: Methicillin-resistant *Staphylococcus aureus*, (DMST 20654), EC: *Escherichia coli* (ATCC 25922), PA: *Pseudomonas aeruginosa* (ATCC 27853), CA: *Cutibacterium acnes*, HS: Hemp seed, TH: Thailand samples RPF-1 (HS-TH-1) and RPF-3 (HS-TH-2), FS: Foreign samples FO#2 (HS-FS-1) and FO#3 (HS-FS-2), O: Hemp seed oil; M: Marc, H: Hexane, E: 80% Ethanol

**Table S3.** Color list of glucosidase and ligands of interest used in the manuscript.

| No |                           |             | RGB System |       |       |
|----|---------------------------|-------------|------------|-------|-------|
|    | Name                      | Color       | R          | G     | B     |
| 1  | Glucosidase               | Tan         | 0.824      | 0.706 | 0.549 |
| 2  | Native ligand             | Light Blue  | 0.529      | 0.808 | 0.922 |
| 3  | Palmitic Acid             | Magenta     | 1.000      | 0.078 | 0.576 |
| 4  | Palmitate, Ethyl ester    | Grey        | 0.827      | 0.827 | 0.827 |
| 5  | Steric Acid               | Yellow      | 1.000      | 0.843 | 0.000 |
| 6  | Oleic Acid                | Organe      | 0.962      | 0.462 | 0.154 |
| 7  | Oleate, Ethyl ester       | Light green | 0.565      | 0.933 | 0.565 |
| 8  | Linoleic Acid             | Purple      | 0.627      | 0.125 | 0.941 |
| 9  | Linoleate, Ethyl ester    | Dark Blue   | 0.118      | 0.565 | 1.00  |
| 10 | Linoleate, Glyceryl ester | Pink        | 0.867      | 0.627 | 0.867 |
| 11 | Linolenic Acid            | Black       | 0.000      | 0.000 | 0.000 |
| 12 | Linolenate, Ethyl ester   | Dark Green  | 0.123      | 0.423 | 0.083 |

**Table S4.** Docking ligands - glucosidase's amino acid interactions list.

| No | Compounds                      | Type                                    | Residues                                                                                                                                           |
|----|--------------------------------|-----------------------------------------|----------------------------------------------------------------------------------------------------------------------------------------------------|
| 1  | Palmitic acid (PA)             | Hydrogen bond                           | HIS351, ASP352, ARG442                                                                                                                             |
|    |                                | Non-bond<br>inteaction                  | TYR72, TYR158, PHE178, ASP215,<br>VAL216, GLU277, PHE303,<br>ARG315, HIS351, ASP352,<br>GLN353, GLU411, ARG442                                     |
| 2  | Palmitate, ethyl ester<br>(PE) | Hydrogen bond<br>Non-bond<br>inteaction | ARG442<br>TYR72, TYR158, PHE159, PHE178,<br>ASP215, VAL216, GLU277,<br>GLN279, PHE303, ARG315,<br>HIS351, ASP352, GLN353,<br>GLU411, ARG442        |
| 3  | Steric acid (SA)               | Hydrogen bond<br>Non-bond<br>inteaction | ASP215, HIS351, ASP352<br>ASP69, TYR72, TYR158, PHE178,<br>ASP215, VAL216, GLU277,<br>GLN279, PHE303, ARG315,<br>HIS351, ASP352, GLU411, ARG442    |
| 4  | Oleic acid (OA)                | Hydrogen bond<br>Non-bond<br>inteaction | HIS351, ARG442<br>TYR72, TYR158, PHE159, PHE178,<br>ASP215, HIS280, PHE303,<br>ARG315, HIS351, ASP352,<br>GLU411, ARG442                           |
| 5  | Oleate, ethyl ester (OE)       | Hydrogen bond<br>Non-bond<br>inteaction | ARG442<br>ASP69, TYR72, TYR158, PHE178,<br>GLU277, GLN279, HIS280,<br>PHE303, ARG315, ASP352,<br>GLN353, GLU411, ARG442,<br>ARG446                 |
| 6  | Linoleic acid (LA)             | Hydrogen bond<br>Non-bond<br>inteaction | HIS351<br>ASP69, TYR72, TYR158, PHE159,<br>PHE178, ASP215, VAL216,<br>GLU277, GLN279, PHE303,<br>ARG315, HIS351, ASP352,<br>GLN353, GLU411, ARG442 |
| 7  | Linoleate, ethyl ester<br>(LE) | Hydrogen bond                           | ARG442                                                                                                                                             |

Non-bond  
inteaction

ASP69, TYR72, TYR158, PHE178,  
ASP215, VAL216, GLU277,  
GLN279, PHE303, ARG315,  
HIS351, ASP352, GLU411, ARG442

---



| No | Compounds                     | Type                                 | Residues                                                                                                                                                               |
|----|-------------------------------|--------------------------------------|------------------------------------------------------------------------------------------------------------------------------------------------------------------------|
| 8  | Linoleic acid, glyceride (LG) | Hydrogen bond<br>Non-bond inteaction | ARG213, ASP215, HIS351, ASP352, ARG442<br>ASP69, TYR72, TYR158, PHE159, PHE178, ASP215, VAL216, GLU277, GLN279, PHE303, ARG315, HIS351, ASP352, GLN353, GLU411, ARG442 |
| 9  | Linolenic acid (LNA)          | Hydrogen bond<br>Non-bond inteaction | HIS351<br>ASP69, TYR72, TYR158, PHE159, PHE178, ASP215, VAL216, GLU277, GLN279, PHE303, ARG315, HIS351, ASP352, GLN353, GLU411, ARG442                                 |
| 10 | Linolenate, ethyl ester       | Hydrogen bond<br>Non-bond inteaction | ARG442<br>ASP69, TYR72, TYR158, PHE159, PHE178, ASP215, VAL216, GLU277, PHE303, ASP307, ARG315, HIS351, ASP352, GLN353, GLU411, ARG442                                 |
| 11 | THC                           | Hydrogen bond<br>Non-bond inteaction | TYR158<br>TYR158, PHE178, VAL216, GLU277, GLN279, PHE303, PHE314, ARG315, TYR316, ASP352, GLU411, ASN415, ARG442                                                       |
| 12 | THCV                          | Hydrogen bond<br>Non-bond inteaction | TYR158<br>TYR158, PHE159, VAL216, GLU277, GLN279, PHE303, PHE314, ARG315, TYR316, ASP352, GLU411, ASN415                                                               |
| 13 | DTBP                          | Hydrogen bond<br>Non-bond inteaction | ARG442<br>TYR158, PHE159, PHE303, ARG315, ASP352                                                                                                                       |

**Table S5.** A detailed re-scoring docking function of fatty in this study.

|    |                                            | C16:00 | C16:00e | C18:00 | C18:01 | C18:01e | C18:02 | C18:02e | C18:03 | C18:03e |
|----|--------------------------------------------|--------|---------|--------|--------|---------|--------|---------|--------|---------|
| No | Energy                                     | PA     | PE      | SA     | OA     | OE      | LA     | LE      | LNA    | LNE     |
| 1  | Final intermolecular Energy (kcal/mol)     | -7.59  | -7.81   | -7.11  | -6.43  | -8.42   | -6.65  | -8.16   | -6.65  | -7.87   |
| 2  | Final Total Internal Energy (kcal/mol)     | -1.53  | -1.98   | -1.74  | -1.49  | -2.02   | -1.89  | -2.34   | -1.89  | -1.89   |
| 3  | Torsional Free Energy (kcal/mol)           | +4.47  | +4.77   | +5.07  | +4.47  | +5.07   | +4.18  | +4.77   | +4.18  | +4.47   |
| 4  | Unbound System's Energy (kcal/mol)         | 0.00   | 0.00    | 0.00   | 0.00   | 0.00    | 0.00   | 0.00    | 0.00   | 0.00    |
| 5  | Estimate Free Energy of Binding (kcal/mol) | -4.65  | -5.02   | -3.77  | -3.45  | -5.37   | -4.36  | -5.73   | -4.36  | -5.29   |
| 6  | EstimateKi (mM)                            | 0.39   | 0.21    | 1.72   | 2.97   | 0.11    | 0.63   | 0.06    | 0.63   | 0.13    |

**Table S6.** A detailed correlation examination between previous experimental data and re-score docking energies.

| No.                        | Name      | Literature | 1                                      | 2                                      | 3                                | 4                                  | 5                                          |
|----------------------------|-----------|------------|----------------------------------------|----------------------------------------|----------------------------------|------------------------------------|--------------------------------------------|
|                            |           | IC50 (uM)  | Final Intermolecular Energy (kcal/mol) | Final Total Internal Energy (kcal/mol) | Torsional Free Energy (kcal/mol) | Unbound System's Energy (kcal/mol) | Estimate Free Energy of Binding (kcal/mol) |
| 1                          | C16:0     | 13.97      | -7.59                                  | -1.53                                  | 4.47                             | 0                                  | -4.65                                      |
| 2                          | C18:0     | 11.34      | -7.11                                  | -1.74                                  | 5.07                             | 0                                  | -3.77                                      |
| 3                          | cis-C18:1 | 0.81       | -6.43                                  | -1.49                                  | 4.47                             | 0                                  | -3.45                                      |
| 4                          | C18:2     | 0.6        | -6.65                                  | -1.89                                  | 4.18                             | 0                                  | -4.36                                      |
| 5                          | C18:3     | 0.54       | -6.65                                  | -1.89                                  | 4.18                             | 0                                  | -4.36                                      |
| Correlation R <sup>2</sup> |           | 1.0000     | -0.9500                                | 0.4117                                 | 0.6593                           | N.D.                               | -0.2465                                    |
